# Supplementary material
Source: publisher site journal article supplement (https://www.dovepress.com/article/332920)
Supplement: Supplementary file 1 [file get_supplementary_file.php]

**Supplementary material**

**Characterization Of PCL/PMMA/6-MP Nanofiber Scaffolds**

**FTIR:** IR spectra were obtained using FTIR model (IR8400s Shimadzu, Japan) in transmittance mode between 4000–400 cm−1, to detectthe chemical structure of 6-MP blended PCL/PMMA nanofibrous scaffolds.

**SEM:**The surface and cross-section morphology of nanofibrous surface of different scaffolds were investigated by scanning electron microscope (FE-SEM, Quattro S, Thermo-Scientific, USA) instrument with high voltage of 5–30 KV. Dried nanofibrous samples were sectioned carefully with specific size, then steady on specific grid. Using Desk Sputter Coater (Vac-Techniche, UK), each nanofibrous sample was coated by a fine layer of gold before SEM examination.

**XRD:** The crystallinity nature of different nanofibers was measured by X-ray diffraction model (Malvern PANalytical, Empyrean3, advance with a tube with a copper anode using at 40 KeV and 30 mA. The sample was mounted on a six-axis goniometer and a locked coupled scan was used. The fingerprint of different scaffolds and pure 6-Mercaptopurine revealed sharp and powerful peaks, indicating its crystallinity as demonstrated by numerous distinct peaks observed at 2θ ~11.8, 14.6, 16.8, 21.2, 23.6, 25.3, 25.9, 27.6, 29.5 and 30.4 angels.

**Mechanical strength:**stretchable force *(*Tensile strength) of different configuration of nanofibrous scaffolds was identified by (Z050, Zwick Roell AG, Ulm, Germany) which is standard uniaxial tensile test. Specimens of dimension (40 ×10 mm) were strained, at a speed of 10 mm/min with a preliminary length of 20 mm and 50N of cell-loads. The measurements were recorded for three specimens of each configuration to get average values, as well as standard deviations (SD).
